# Supplementary material for: Cancer Survivors’ Experiences of Navigating the Australian Health Care System for Physical and Mental Health Care Needs
Source: MDPI journal article supplement (doi:10.3390/ijerph20053988), 2023-02-23
Supplement: s1 [file s1]

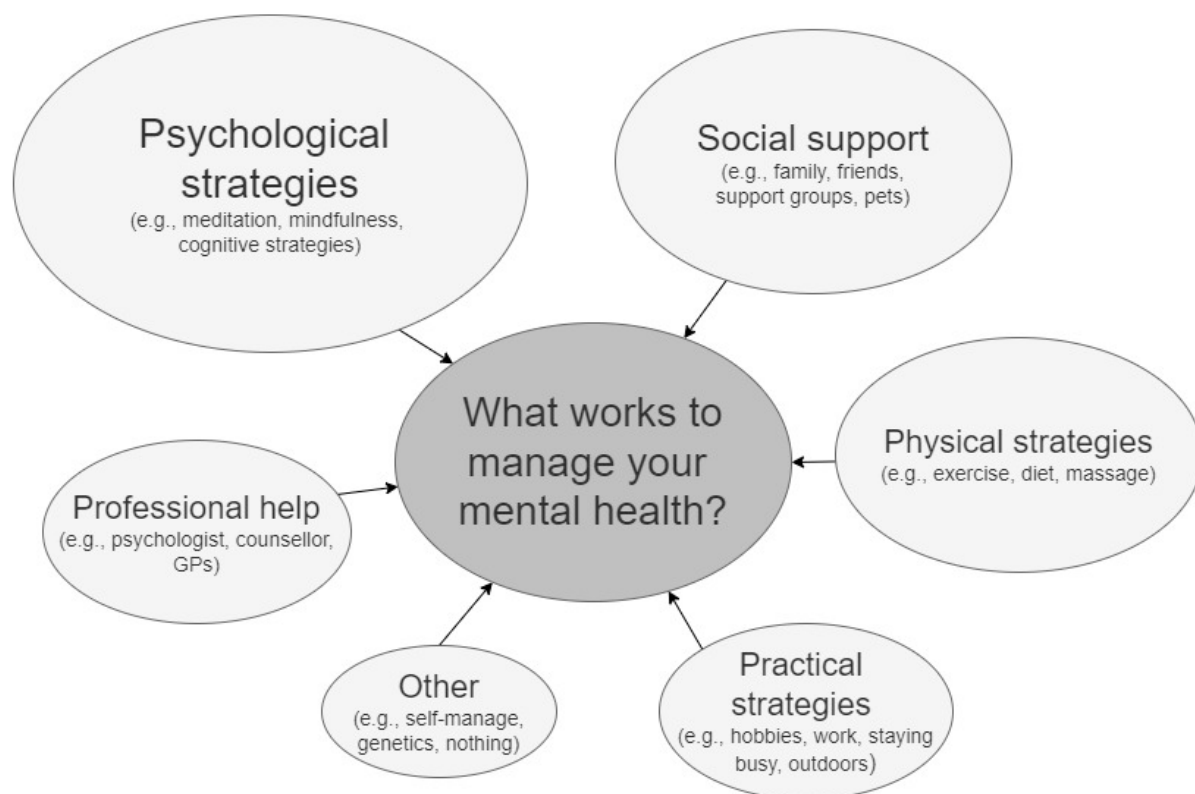

**Figure S1.** Strategies that participants identified as working to manage their mental health. Larger shapes indicate a greater number of responses coded in that theme.

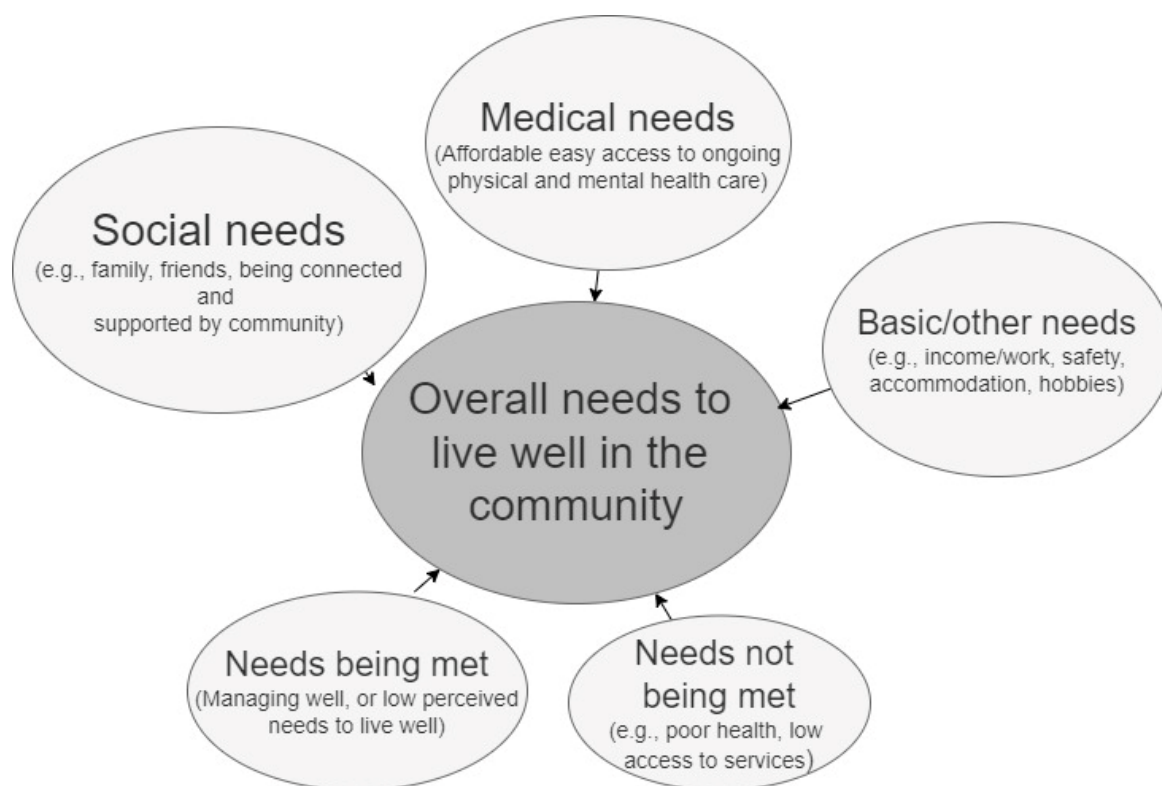

**Figure S2.** Participant reported needs to live well in the community. Larger shapes indicate a greater number of responses coded in that theme.
